# Supplementary material for: Phylogenetic and Transcriptomic Analysis of Chemosensory Receptors in a Pair of Divergent Ant Species Reveals Sex-Specific Signatures of Odor Coding
Source: PLoS Genet. 2012 Aug 30;8(8):e1002930. doi: 10.1371/journal.pgen.1002930 (PMC3431598; doi:10.1371/journal.pgen.1002930)
Supplement: Table S3 — Expression patterns of (co-)orthologous Or genes in C. floridanus and H. saltator. (XLS) [file pgen.1002930.s018.xls]

## Sheet: Table S2
Subfamily	Orthologous group	Group member	log2(FPKM:worker/FPKM:male)		Color code:
Orco	1	CfOrco	0.0938832		Orthologous group in which C. floridanus and H. saltator ORs show same patterns of caste-enrichment
		HsOrco	0.650224		Orthologous group in which C. floridanus and H. saltator ORs show opposite patterns of caste-enrichment
A	2	CfOr192	0.741778		Orthologous group in which C. floridanus (or H. saltator) ORs show conflicting patterns of caste-enrichment
		HsOr202	0.820223
	3	CfOr197	-0.0595094		ORs enriched in worker by at least 2-fold
		HsOr192	4.621		ORs enriched in male by at least 2-fold
		HsOr193	1.9398
		HsOr206	-0.939984
		HsOr207	3.5131
		HsOr208	2.98396
	4	CfOr195	-0.229041
		CfOr193	1.06815
		CfOr194	2.24763
		HsOr195	3.91867
		HsOr196	5.63148
		HsOr197	5.01832
		HsOr198	4.5226
		HsOr200	2.63083
B	5	CfOr188	-1.16091
		HsOr188	2.68229
C	6	CfOr217	0.622291
		HsOr219	0.0767777
D	7	CfOr263	4.87091
		HsOr182	3.61035
		HsOr183	4.49506
E	8	CfOr229	1.13791
		CfOr230	0.222239
		CfOr231	0.758805
		CfOr232	0.288684
		HsOr240	5.9959
		HsOr241	4.24094
		HsOr242	0.224882
	9	CfOr233	0.150487
		CfOr234	0.0249196
		CfOr251	0.0907056
		CfOr250	-0.00632846
		HsOr239	-2.72829
	10	CfOr257	4.65177
		HsOr226	1.98333
	11	CfOr224	1.3312
		HsOr220	3.28576
	12	CfOr222	1.54789
		HsOr221	5.05692
	13	CfOr220	0.322932
		CfOr219	0.194082
		HsOr224	-3.62901
F	14	CfOr191	-0.110899
		HsOr191	2.22744
Unclassified	15	CfOr211	-4.09909
		HsOr215	0.340157
H	16	CfOr200	0.953391
		HsOr209	8.72279
		HsOr217	3.29465
		HsOr218	4.30778
	17	CfOr214	0.359922
		HsOr214	2.7514
	18	CfOr212	0.257013
		CfOr213	-0.80083
		HsOr216	5.01758
9-exon	19	CfOr271	-0.775634
		CfOr272	-0.270824
		CfOr365	0.0920352
		CfOr366	-0.129881
		HsOr255	3.09383
	20	CfOr341	0.459884
		HsOr244	0.525543
	21	CfOr274	-1.21499
		CfOr275	-0.69274
		CfOr276	1.03201
		CfOr297	0.571353
		CfOr330	0.819491
		CfOr360	-0.669473
		HsOr303	2.85729
		HsOr304	3.32012
		HsOr305	2.94975
	22	CfOr389	-0.584068
		HsOr261	3.12656
	23	CfOr388	-1.40737
		HsOr260	3.63028
	24	CfOr283	0.591107
		CfOr288	2.72585
		CfOr289	4.07717
		CfOr290	3.69798
		CfOr291	1.35111
		CfOr292	0.666502
		HsOr364	4.0784
		HsOr365	4.3355
		HsOr366	4.72097
		HsOr367	0.970298
		HsOr368	-0.0416215
	25	CfOr390	0.0240568
		CfOr391	-1.73017
		HsOr362	2.94151
		HsOr363	4.64324
	26	CfOr282	0.404152
		CfOr284	1.0016
		CfOr285	1.09305
		CfOr287	0.870757
		CfOr392	-0.331227
		HsOr256	2.95398
		HsOr355	6.41842
		HsOr356	7.79571
		HsOr358	5.86685
		HsOr359	5.50086
		HsOr361	6.65954
		HsOr353	5.80261
	27	CfOr343	5.44472
		CfOr344	1.79769e+308
		HsOr369	5.86029
	28	CfOr396	1.57688
		HsOr312	1.19154
		HsOr313	1.65407
	29	CfOr354	1.83273
		CfOr355	1.09739
		HsOr343	2.11911
		HsOr344	1.88256
	30	CfOr358	2.14873
		HsOr345	1.68242
	31	CfOr359	1.38986
		HsOr349	3.53223
	32	CfOr357	1.05835
		HsOr263	3.60001
		HsOr346	2.70474
		HsOr347	2.84712
		HsOr348	3.24694
	33	CfOr397	1.39218
		HsOr314	0.573799
	34	CfOr363	2.48822
		CfOr362	1.49061
		CfOr361	1.59514
		HsOr350	2.66283
	35	CfOr364	2.65016
		HsOr351	3.19501
	36	CfOr398	1.57173
		HsOr324	0.147137
	37	CfOr399	1.88186
		CfOr400	1.65647
		HsOr323	1.16496
	38	CfOr353	0.635264
		HsOr339	0.05419
	39	CfOr394	1.81146
		HsOr310	2.14507
	40	CfOr349	0.239041
		CfOr347	1.50692
		CfOr350	-1.91234
		CfOr393	0.405063
		HsOr308	0.75587
		HsOr329	1.77951
	41	CfOr337	1.64602
		CfOr339	2.99081
		CfOr340	3.30644
		CfOr352	0.159697
		HsOr337	0.984815
		HsOr335	1.4131
		HsOr336	1.46145
	42	CfOr328	4.16192
		HsOr282	7.34219
		HsOr287	1.79769e+308
		HsOr288	1.79769e+308
	43	CfOr303	4.09383
		CfOr371	4.57949
		CfOr374	3.64148
		CfOr369	4.47854
		CfOr375	5.41826
		CfOr370	4.51273
		HsOr289	1.79769e+308
		HsOr290	11.0819
		HsOr291	7.49698
		HsOr292	10.5215
		HsOr293	7.58749
J	44	CfOr190	-1.40806
		HsOr189	0.686138
	45	CfOr189	-0.935973
		HsOr190	1.37592
K	46	CfOr48	1.76744
		HsOr43	0.749816
	47	CfOr47	0.629773
		HsOr42	0.94894
L	48	CfOr44	-0.807729
		HsOr40	-0.40429
	49	CfOr45	-0.0988856
		CfOr46	0.655115
		HsOr41	0.380824
	50	CfOr10	-0.716114
		HsOr53	-2.02457
	51	CfOr9	-0.27689
		HsOr52	-1.34801
	52	CfOr3	0.645153
		CfOr4	0.475023
		CfOr5	0.843556
		CfOr6	0.437547
		CfOr7	0.154376
		CfOr8	0.757989
		HsOr48	0.358508
	53	CfOr24	-1.12542
		CfOr25	0.397823
		CfOr28	0.141779
		HsOr20	-2.22266
	54	CfOr22	0.325559
		HsOr19	-0.930826
	55	CfOr31	-0.201574
		HsOr22	-1.76667
	56	CfOr36	0.528076
		CfOr37	0.250751
		CfOr38	0.0342968
		CfOr39	-0.112109
		HsOr34	-1.58194
	57	CfOr33	-0.311165
		CfOr34	0.313414
		HsOr28	-0.578024
		HsOr29	-1.17914
		HsOr25	-0.999364
		HsOr26	-0.657743
		HsOr27	-0.815377
	58	CfOr43	0.173656
		HsOr36	-2.67518
		HsOr37	-4.24901
	59	CfOr11	0.299089
		HsOr54	1.24273
	60	CfOr20	0.0441629
		CfOr21	-0.686993
		HsOr13	1.84174
		HsOr14	0.514849
		HsOr15	-0.300957
		HsOr16	0.0100452
		HsOr17	0.624051
	61	CfOr13	1.17741
		HsOr56	1.26084
	62	CfOr16	-0.220548
		HsOr6	-1.56812
	63	CfOr17	-0.407151
		HsOr7	-1.479
	64	CfOr18	-0.201977
		HsOr8	0.141977
	65	CfOr19	-0.636935
		HsOr9	-0.853216
		HsOr11	-0.378629
M	66	CfOr61	-0.847591
		HsOr60	-0.6794
	67	CfOr60	-2.06605
		HsOr61	-1.90055
	68	CfOr58	-0.918198
		HsOr62	-2.2621
Unclassified	69	CfOr53	-0.561483
		HsOr66	0.340999
N	70	CfOr68	-0.506908
		HsOr72	1.58593
	71	CfOr59	-1.05054
		HsOr63	-2.26631
	72	CfOr54	0.482433
		CfOr56	-1.2218
		CfOr93	-0.467864
		HsOr65	-1.38608
P	73	CfOr92	0.291745
		HsOr74	2.90328
	74	CfOr50	0.0812557
		CfOr49	1.01659
		CfOr79	0.444635
		CfOr80	0.0110055
		CfOr81	-0.436851
		CfOr82	0.070887
		CfOr83	-0.476454
		CfOr86	0.462949
		CfOr87	0.78407
		CfOr88	0.0507724
		CfOr89	0.783823
		CfOr63	0.737354
		CfOr90	1.20216
		CfOr91	1.19987
		CfOr64	-0.0557152
		CfOr65	2.73781
		CfOr66	0.803603
		CfOr67	1.53324
		CfOr69	-0.625367
		CfOr70	0.0425349
		CfOr71	0.523009
		CfOr72	-0.00997393
		CfOr73	-0.0804899
		CfOr74	0.369798
		CfOr75	0.780555
		CfOr76	0.0224547
		CfOr77	0.577901
		CfOr62	0.697126
		CfOr78	0.518182
		CfOr94	-0.321865
		CfOr96	-0.931718
		CfOr98	0.253972
		CfOr99	0.820799
		CfOr100	0.357089
		CfOr101	1.21164
		HsOr67	1.51016
		HsOr68	1.24833
		HsOr70	1.56143
		HsOr71	1.31129
R	75	CfOr187	1.06018
		HsOr179	1.24843
		HsOr186	6.50163
T	76	CfOr102	-0.48269
		HsOr78	-0.696768
	77	CfOr103	0.265474
		CfOr104	1.1898
		CfOr106	0.3697
		CfOr107	-0.392554
		CfOr108	0.231246
		CfOr109	0.633409
		CfOr110	0.422526
		HsOr81	3.55109
		HsOr82	2.65836
		HsOr83	6.13987
		HsOr84	4.07239
		HsOr85	4.88598
		HsOr86	1.29029
U	78	CfOr138	-2.37337
		HsOr120	1.47715
		HsOr121	5.0261
	79	CfOr137	-0.750765
		HsOr122	4.57195
V	80	CfOr186	-1.44524
		HsOr163	2.25019
	81	CfOr185	-0.808234
		HsOr162	1.59251
	82	CfOr175	-1.36508
		HsOr146	1.58354
	83	CfOr183	-0.734609
		HsOr160	1.98504
	84	CfOr181	0.267494
		HsOr157	2.44173
		HsOr158	2.67755
	85	CfOr182	-1.08833
		HsOr159	2.64155
	86	CfOr179	-0.393102
		CfOr180	0.921877
		HsOr155	4.20965
	87	CfOr178	-0.457317
		HsOr154	3.44988
	88	CfOr176	0.356102
		HsOr148	2.61447
		HsOr149	2.21217
		HsOr150	0.00387275
		HsOr151	1.94665
		HsOr152	4.1204
		HsOr153	2.27748
	89	CfOr184	-1.25031
		HsOr161	2.48615
	90	CfOr174	-1.24506
		HsOr145	1.84106
	91	CfOr148	-0.615852
		HsOr123	3.70412
	92	CfOr173	0.338146
		CfOr161	0.202012
		CfOr162	-0.195066
		CfOr163	0.521881
		CfOr164	0.351085
		CfOr165	0.0637988
		CfOr166	-0.164273
		CfOr167	0.656373
		CfOr168	-0.213789
		CfOr169	-0.562987
		CfOr170	0.348006
		CfOr171	0.122089
		CfOr172	-0.294448
		HsOr142	1.52993
		HsOr144	1.2224
	93	CfOr158	-0.184617
		HsOr135	3.079
		HsOr136	3.92472
	94	CfOr159	0.0317775
		CfOr160	-0.17685
		HsOr137	3.67664
		HsOr138	4.03063
		HsOr139	5.76049
		HsOr141	5.76395
	95	CfOr151	0.278711
		HsOr170	0.975091
		HsOr169	2.70075
	96	CfOr142	-0.0697892
		CfOr143	0.591081
		CfOr144	0.545839
		CfOr145	1.27711
		CfOr146	1.61763
		CfOr147	0.356703
		CfOr141	0.375263
		HsOr124	3.98836
		HsOr125	3.69597
		HsOr126	3.24075
		HsOr127	3.35556
		HsOr128	3.29148
		HsOr129	3.9159
		HsOr130	2.28775
		HsOr174	-0.264154
		HsOr171	2.9422
		HsOr173	0.242519
	97	CfOr140	-0.00301627
		HsOr175	0.803127
	98	CfOr139	0.401657
		HsOr176	2.35323
